# Supplementary material for: Cellular responses to halofuginone reveal a vulnerability of the GCN2 branch of the integrated stress response
Source: PubMed Central journal article supplement (PMC9156968; doi:10.15252/embj.2021109985), 2022-04-25
Supplement: EMBJ-41-e109985-s001.pdf [file EMBJ-41-e109985-s001.pdf]

## Expanded View Figures

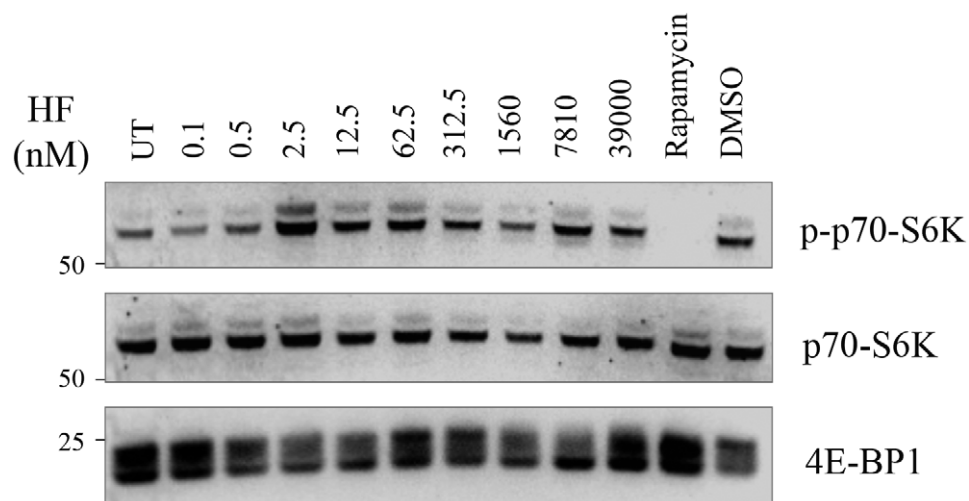**Figure EV1. mTORC1 activation upon HF treatment.**

Representative immunoblots of indicated proteins in lysates from HeLa cells treated for 5 h with indicated concentrations of HF or 200 nM Rapamycin for 3 h.

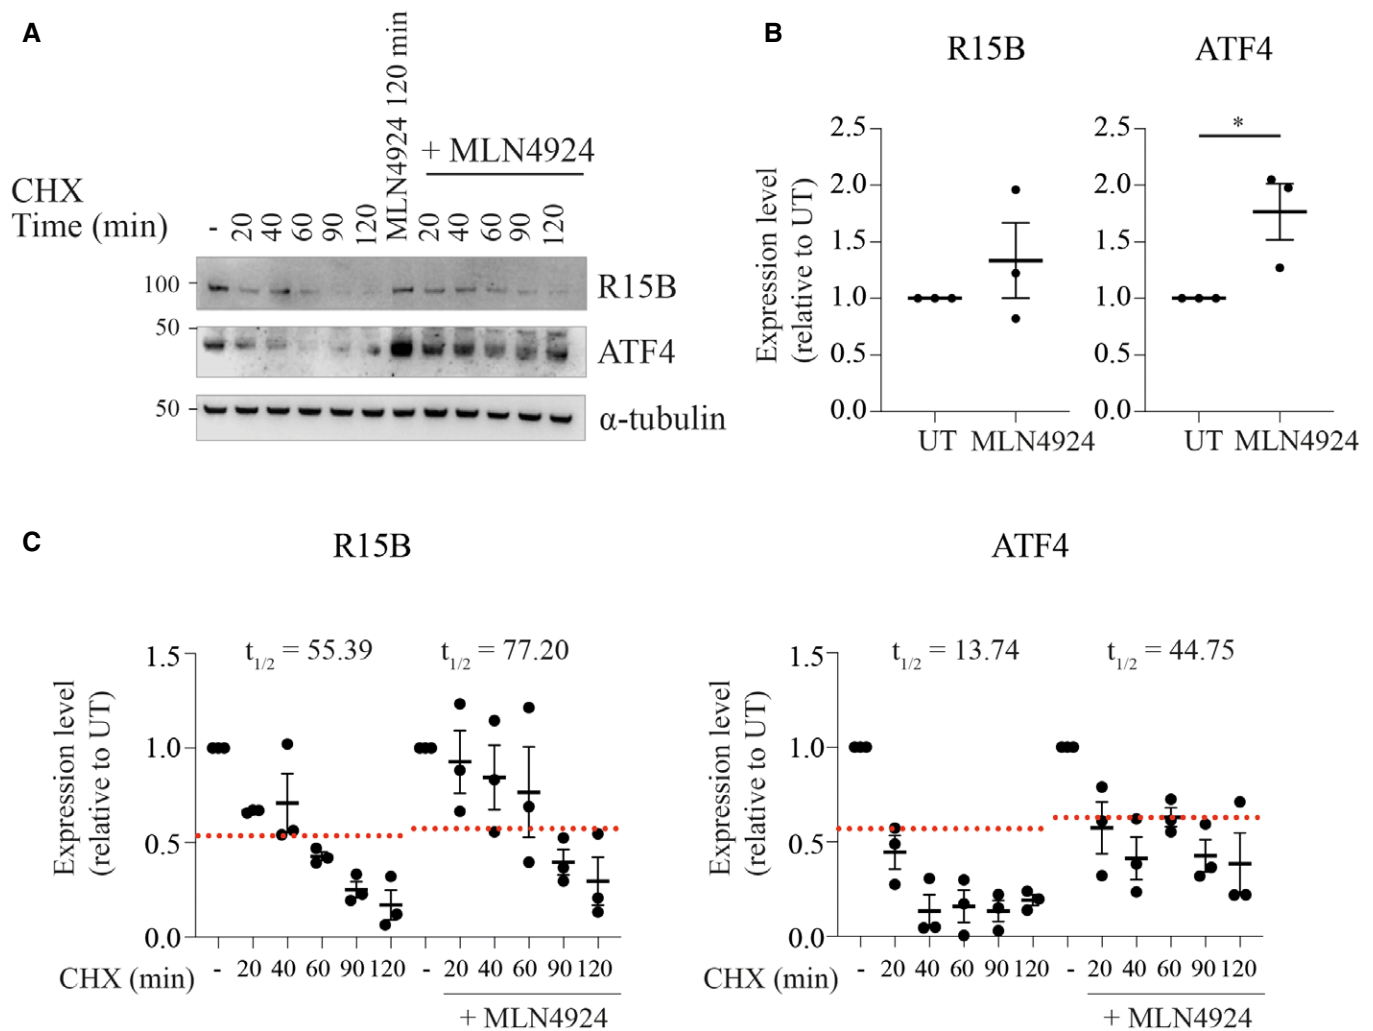

**Figure EV2. The Nedd8-activating enzyme inhibitor MLN4924 stabilizes ATF4 and R15B.**

A Representative immunoblots of the indicated proteins in lysates from HeLa cells treated with cycloheximide (20  $\mu$ g/ml) with or without the inhibitor of the NEDD8-activating enzyme MLN4924 (1  $\mu$ M) for indicated times.

B Quantification of R15B and ATF4 in cells treated with MLN4924 (1  $\mu$ M) for 120 min. Data are mean  $\pm$  SEM ( $n = 3$  biological replicates). \* $P = 0.0369$ , as determined by unpaired  $t$ -test.

C Quantification of experiments such as the ones shown in (A).  $t_{1/2}$  values were calculated with results from 3 independent experiments. Data are mean  $\pm$  SEM ( $n = 3$  biological replicates).

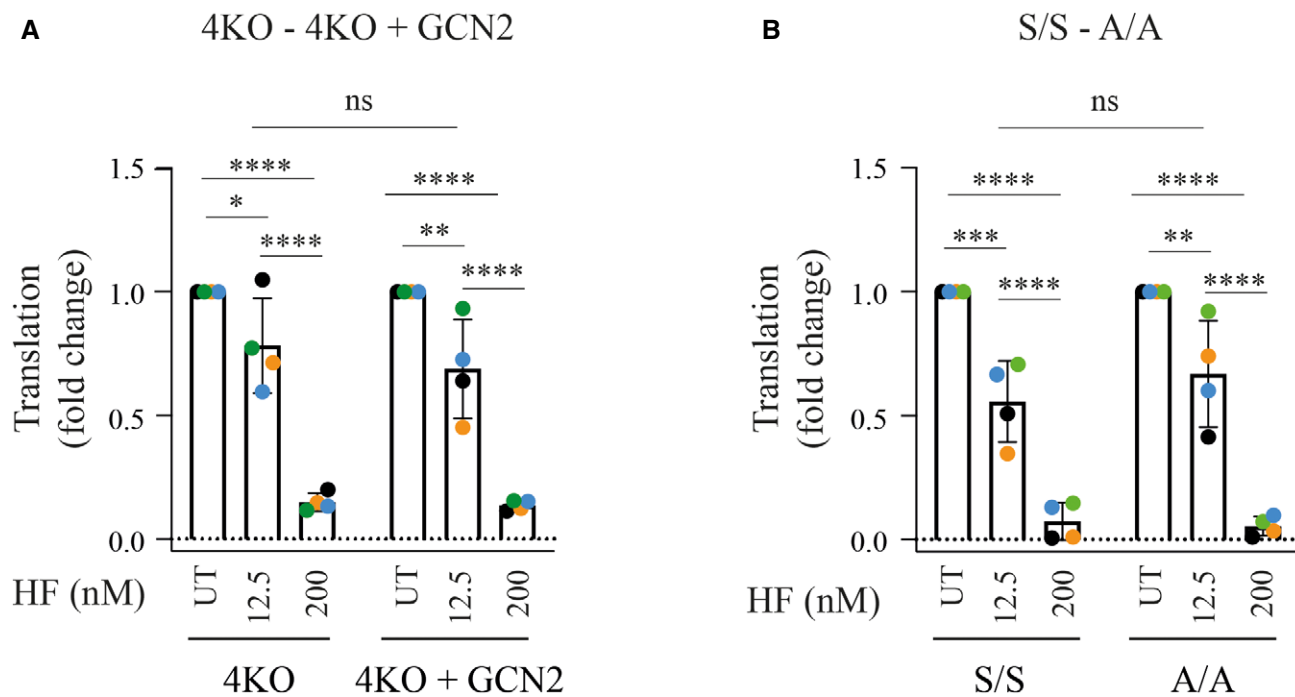

**Figure EV3. Translational attenuation following HF is independent of GCN2 or eIF2 $\alpha$  phosphorylation.**

A, B Quantification of  $^{35}\text{S}$ -methionine labeling in experiments such as the ones shown in Fig 6C and D, respectively. Data are mean  $\pm$  SD ( $n \geq 3$  biological replicates). \* $P \leq 0.0376$ , \*\* $P \leq 0.0031$ , \*\*\* $P \leq 0.0001$ , \*\*\*\* $P < 0.0001$ , ns: not significant, as determined by two-way ANOVA.

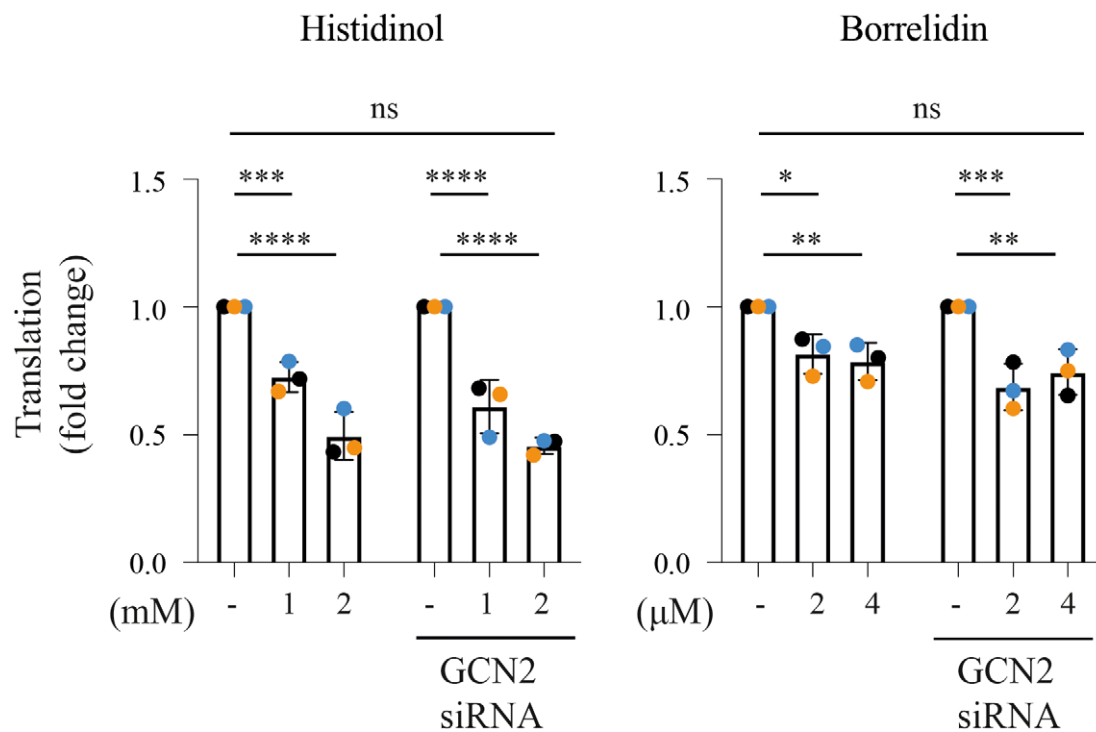

**Figure EV4.**

**Figure EV4. Translational attenuation following histidinol or borrelidin is independent of GCN2.**

Quantification of <sup>35</sup>S-methionine labeling in experiments such as the ones shown in Fig 6I. Data are mean ± SD (n = 3 biological replicates). \*P ≤ 0.0116, \*\*P ≤ 0.0044, \*\*\*\*P ≤ 0.0004, \*\*\*\*\*P < 0.0001, ns: not significant, as determined by two-way ANOVA.

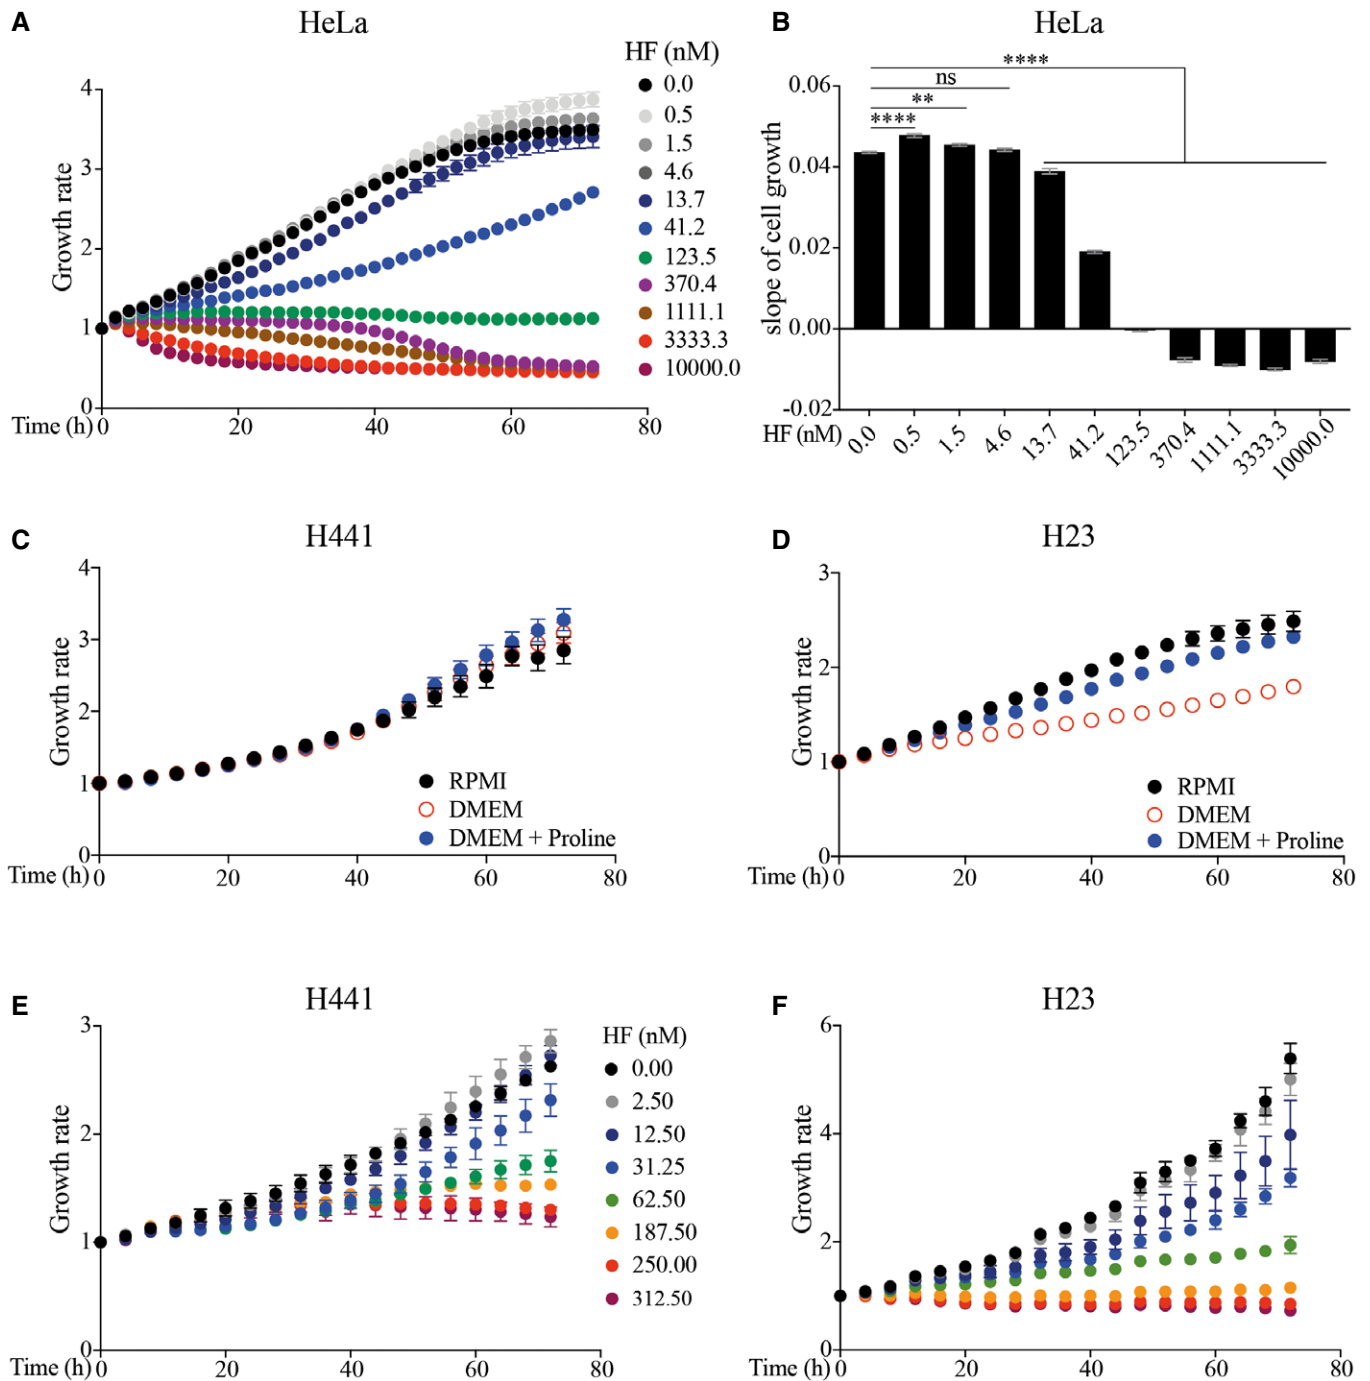

Figure EV5.

**Figure EV5. Differential effect of HF on growth rates of HeLa, H441 and H23 cells.**

- A, B Growth rates (A) and the corresponding slopes of cell growth (B) of HeLa cells treated with indicated concentrations of HF and monitored for 72 h at 37°C in an Incucyte S3 system. Slope of cell growth was determined by simple linear regression curve fit of exponential cellular growth rate (0–56 h) in distinct conditions. Data are mean ( $n \geq 4$  biological replicates)  $\pm$  SEM. \*\* $P = 0.0073$ , \*\*\*\* $P < 0.0001$ , as determined by one-way ANOVA with Dunnett's multiple comparison test. ns: not significant.
- C, D Growth rates of H441 (C) and H23 (D) lung cancer cell lines grown for 72 h at 37°C in an Incucyte S3 system in RPMI (containing 20 mg/l Proline) media versus DMEM (Proline-free) or DMEM supplemented with 20 mg/l Proline. Data are mean ( $n = 4$  biological replicates)  $\pm$  SEM.
- E, F Growth rates of H441 (E) and H23 (F) cells exposed to indicated concentrations of HF for 72 h at 37°C in an Incucyte S3 system. Data are mean ( $n = 3$  biological replicates)  $\pm$  SD.
